# Supplementary material for: Peer Learning and Support of Technology in an Undergraduate Biology Course to Enhance Deep Learning
Source: Atypon-hosted journal article supplement (doi:10.1187/cbe.12-04-0042), 2012-12-01
Supplement: combinedsupmats.pdf [file combinedsupmats.pdf]

**Appendix 1.** A rubric for scoring each of the team students by the TA.

| Criteria                             | Explanation                                                                                           | Weight (%) |
|--------------------------------------|-------------------------------------------------------------------------------------------------------|------------|
| Effort                               | To what extent did the student put an effort in looking for relevant data and studying basic material | 30         |
| Engagement                           | To what extent was the student engaged in the team work (e.g. contribution, comments, responses)      | 20         |
| Revising following mentor's feedback | To what extent did the student implement TA's feedback                                                | 30         |
| Artifact (team score)                | The quality of the presentation (scientific accuracy, relevance, clarity)                             | 20         |
